- Li J, Wang L, Mamon H, Kulke MH, Berbeco R, Makrigiorgos GM. Replacing PCR with COLD-PCR enriches variant DNA sequences and redefines the sensitivity of genetic testing. *Nat Med* 2008;14:579–84.
- Galbiati S, Smid M, Gambini D, Ferrari A, Restagno G, Viora E, et al. Fetal DNA detection in maternal plasma throughout gestation. *Hum Genet* 2005;117:243–8.
- Galbiati S, Foglieni B, Travi M, Curcio C, Restagno G, Sbaiz L et al. Peptide-nucleic acid-mediated enriched polymerase chain reaction as a key point for non-invasive prenatal diagnosis of beta-thalassemia. *Haematologica* 2008;93:610–4.
- Du J, Zou X, Pan Y, Lu G-X. Noninvasive prenatal diagnosis of congenital adrenal hyperplasia in cell-free fetal DNA with COLD-PCR [Abstract]. *Fertil Steril* 2009;92:S199–200.

**Silvia Galbiati**<sup>2</sup>

**Angela Brisci**<sup>2</sup>

**Faustina Lalatta**<sup>3</sup>

**Manuela Seia**<sup>4</sup>

**G. Mike Makrigiorgos**<sup>5</sup>

**Maurizio Ferrari**<sup>2,6,7†</sup>

**Laura Cremonesi**<sup>2†\*</sup>

<sup>2</sup> *San Raffaele Scientific Institute  
Genomic Unit for the Diagnosis of  
Human Pathologies  
Center for Genomics and Bioinformatics  
Milan, Italy*

<sup>3</sup> *UO Dipartimentale di Genetica Medica and*

<sup>4</sup> *Laboratorio di Genetica Medica  
Fondazione IRCCS Ca' Granda  
Ospedale Maggiore  
Policlinico  
Milan, Italy*

<sup>5</sup> *Radiation Therapy*

*Dana-Farber/Brigham and  
Women's Cancer Center  
Brigham and Women's Hospital  
Boston, MA*

<sup>6</sup> *Università Vita-Salute San Raffaele  
Milan, Italy*

<sup>7</sup> *Diagnostica e Ricerca San Raffaele SpA  
Milan, Italy*

† These authors contributed equally to the work.

\* Address correspondence to this author at:  
Genomic Unit for the Diagnosis of Human  
Pathologies  
San Raffaele Scientific Institute  
Via Olgettina 60

20132 Milan, Italy

Fax +39-02-26434351

E-mail cremonesi.laura@hsr.it

Previously published online at  
DOI: 10.1373/clinchem.2010.155671

## The Effects of Sampling Procedures and Storage Conditions on Short-term Stability of Blood-Based Biochemical Markers of Bone Metabolism

### To the Editor:

The prevalence and incidence of metabolic bone disease are rising as the population ages (1). In conjunction with imaging and clinical history, biochemical bone markers have become increasingly important in diagnosis and for monitoring bone disease (2, 3).

Little evidence is available regarding preanalytical influences on short-term stability of bone markers. We have evaluated the effects of sample type, processing, and storage procedures on the stability of biochemical markers of bone turnover [C-terminal telopeptide of type 1 collagen ( $\beta$ -CTX), N-terminal propeptide of procollagen type 1 (P1NP), osteocalcin (OC), bone-specific alkaline phosphatase (bone ALP), and parathyroid hormone (PTH)].

After obtaining informed consent, we collected venous blood samples from 18 patients with metabolic bone disease into lithium heparin-containing, EDTA-containing, and serum Sarstedt blood-collection systems.

<sup>1</sup> Nonstandard abbreviations:  $\beta$ -CTX, C-terminal telopeptide of type 1 collagen; P1NP, N-terminal propeptide of procollagen type 1; OC, osteocalcin; bone ALP, bone-specific alkaline phosphatase; PTH, parathyroid hormone.

We investigated the use of 3 sample-processing protocols (6 patients each): (a) delayed separation from cells (samples stored at room temperature for 1, 2, 4, 8, 24, or 48 h after venesection before separation); (b) immediate separation and storage at room temperature (plasma and serum aliquots left at room temperature for 2 h, 4 h, 8 h, 24 h, 48 h, or 7 days); and (c) immediate separation and storage at 2 °C–8 °C (plasma and serum aliquots stored at 2 °C–8 °C for 24 h, 48 h, 7 days, 14 days, or 28 days).

All samples were then stored at –70 °C until analysis of each batch. Baseline samples for each sample type (produced by immediate separation and storage of plasma or serum aliquots at –70 °C) were analyzed for all patients. We measured  $\beta$ -CTX, P1NP, OC, and PTH on the Modular Analytics E 170/Elecsys® platform (Roche). In addition, we used the Metra Biosystems enzymatic immunoassay to measure bone ALP (in duplicate, serum samples only) in 3 patients from each sample-processing protocol. The assays were assessed for intraassay imprecision by duplicate analysis of each sample for each container type, and interassay imprecision was assessed with QC material. For all assays, mean CVs were <10%.

After analysis, we used 1-way ANOVA with Bonferroni-corrected post hoc *t*-tests to compare analyte concentrations at each time point with the baseline concentration (Table 1). Mean values were considered significantly different at *P* values <0.05.

The stability of each analyte was evaluated according to the criteria of the 2002 WHO guidelines (4, 5) and was defined as the amount of time the change in concentration remained less than half of the total error of the sum of the biological and analytical variation. The calculated value was <5.4%

**Table 1. Analyte concentrations compared with baseline values for samples stored unseparated for up to 48 h at room temperature, stored separated for up to 7 days at room temperature, and stored separated for up to 28 days at 2 °C–8 °C.<sup>a</sup>**

| Analyte and sample type       | Unseparated and stored at room temperature |                   |                    |                    |             | Separated and stored at room temperature |                    |                    |             |                    | Separated and stored at 2 °C–8 °C |                    |                    |         |  |
|-------------------------------|--------------------------------------------|-------------------|--------------------|--------------------|-------------|------------------------------------------|--------------------|--------------------|-------------|--------------------|-----------------------------------|--------------------|--------------------|---------|--|
|                               | Immediate                                  | 8 h               | 24 h               | 48 h               | Immediate   | Immediate                                | 24 h               | 48 h               | 7 days      | 7 days             | 48 h                              | 7 days             | 14 days            | 28 days |  |
| $\beta$ -CTX, $\mu\text{g/L}$ |                                            |                   |                    |                    |             |                                          |                    |                    |             |                    |                                   |                    |                    |         |  |
| Lithium heparin               | 0.56 (0.04)                                | 0.51 (0.04)       | <b>0.42 (0.02)</b> | <b>0.29 (0.02)</b> | 0.30 (0.08) | <b>0.24 (0.07)</b>                       | <b>0.19 (0.05)</b> | <b>0.09 (0.03)</b> | 0.45 (0.09) | <b>0.36 (0.08)</b> | <b>0.31 (0.07)</b>                | <b>0.18 (0.04)</b> | <b>0.17 (0.04)</b> |         |  |
| EDTA                          | 0.56 (0.05)                                | 0.53 (0.04)       | 0.55 (0.05)        | 0.51 (0.05)        | 0.29 (0.08) | 0.31 (0.08)                              | 0.28 (0.08)        | 0.26 (0.08)        | 0.45 (0.10) | 0.39 (0.09)        | 0.38 (0.09)                       | <b>0.41 (0.09)</b> | <b>0.35 (0.08)</b> |         |  |
| Serum                         | 0.57 (0.05)                                | 0.49 (0.03)       | <b>0.43 (0.03)</b> | <b>0.29 (0.01)</b> | 0.30 (0.08) | 0.30 (0.07)                              | 0.24 (0.06)        | <b>0.14 (0.04)</b> | 0.47 (0.10) | 0.45 (0.09)        | 0.40 (0.08)                       | <b>0.34 (0.07)</b> | <b>0.24 (0.06)</b> |         |  |
| OC, $\mu\text{g/L}$           |                                            |                   |                    |                    |             |                                          |                    |                    |             |                    |                                   |                    |                    |         |  |
| Lithium heparin               | 30.9 (5.2)                                 | 27.2 (4.6)        | <b>20.3 (2.1)</b>  | 23.6 (5.4)         | 19.5 (6.1)  | <b>15.8 (5.3)</b>                        | <b>17.1 (5.2)</b>  | <b>13.9 (4.6)</b>  | 27.3 (9.0)  | 26.0 (8.6)         | 25.2 (8.3)                        | <b>23.9 (8.1)</b>  | <b>22.7 (7.9)</b>  |         |  |
| EDTA                          | 30.6 (5.6)                                 | 32.1 (5.1)        | 27.5 (4.7)         | 25.4 (4.9)         | 19.6 (6.1)  | 20.8 (5.8)                               | <b>18.0 (5.6)</b>  | <b>17.1 (5.5)</b>  | 28.8 (10.4) | 28.6 (10.0)        | 27.6 (9.5)                        | 26.5 (9.5)         | <b>25.4 (9.3)</b>  |         |  |
| Serum                         | 30.6 (4.7)                                 | <b>25.7 (5.0)</b> | <b>23.6 (4.9)</b>  | <b>20.6 (4.6)</b>  | 18.7 (6.0)  | <b>17.2 (5.6)</b>                        | <b>14.4 (4.9)</b>  | <b>13.1 (4.5)</b>  | 28.4 (10.1) | 26.8 (9.5)         | <b>25.2 (9.2)</b>                 | <b>23.1 (9.0)</b>  | <b>21.6 (8.4)</b>  |         |  |
| PTH, pmol/L                   |                                            |                   |                    |                    |             |                                          |                    |                    |             |                    |                                   |                    |                    |         |  |
| Lithium heparin               | 9.1 (2.0)                                  | 8.4 (1.9)         | 7.8 (2.0)          | 7.9 (1.5)          | 5.7 (2.0)   | 5.4 (1.8)                                | 5.4 (1.8)          | 5.0 (1.8)          | 4.2 (0.3)   | 4.2 (0.2)          | 4.0 (0.3)                         | 4.1 (0.2)          | 3.7 (0.3)          |         |  |
| EDTA                          | 8.4 (1.7)                                  | 8.4 (1.8)         | 8.5 (1.5)          | 7.4 (1.1)          | 5.8 (1.9)   | 6.0 (1.9)                                | 5.5 (1.8)          | 5.1 (1.7)          | 4.4 (0.4)   | 4.4 (0.5)          | 4.5 (0.4)                         | 4.2 (0.4)          | 4.2 (0.3)          |         |  |
| Serum                         | 9.6 (1.9)                                  | 8.5 (1.9)         | <b>7.6 (1.8)</b>   | <b>6.5 (1.6)</b>   | 5.6 (1.9)   | 5.3 (2.0)                                | <b>4.2 (1.7)</b>   | <b>2.9 (1.3)</b>   | 4.1 (0.3)   | 4.0 (0.3)          | 3.6 (0.3)                         | <b>2.7 (0.4)</b>   | <b>2.2 (0.5)</b>   |         |  |

<sup>a</sup> Data are presented as the mean (SE). Values in boldface indicate a significant difference from the baseline (immediate) value ( $P < 0.05$ ). Samples were also separated 1, 2, and 4 h after collection at room temperature and stored at room temperature for 2, 4, and 8 h after separation and at 2 °C–8 °C for 24 h after separation. No significant differences between these samples and baseline values were found for any of the analytes.

for  $\beta$ -CTX, <3.7% for P1NP, <4.2% for OC, and <4.3% for bone ALP. Because PTH is a regulatory hormone and because quantifying its biological variation is difficult, PTH stability was defined by the amount of time a change of <10% occurred.

We found P1NP and bone ALP to be stable and identified no significant changes for any sample types over the time periods investigated. By the WHO criteria,  $\beta$ -CTX was stable in EDTA for 48 h at room temperature and for 7 days at 2 °C–8 °C. In lithium heparin,  $\beta$ -CTX was stable for 4 h at room temperature and for <24 h at 2 °C–8 °C.  $\beta$ -CTX in serum was stable for 4 h when stored unseparated at room temperature, for 8 h when stored separated at room temperature, and for 48 h when stored separated at 2 °C–8 °C.

OC in EDTA was stable for 8 h when stored unseparated or separated at room temperature and was stable for 7 days when stored separated at 2 °C–8 °C. Lithium heparin and serum samples were less stable, however, with unseparated samples being stable for 2 h and 1 h, respectively. Separated samples, however, were stable for 2 h at room temperature and for 24 h at 2 °C–8 °C. PTH was stable for 8 h when stored unseparated in lithium heparin and was stable for 48 h when stored unseparated in EDTA. PTH was stable for 48 h and 28 days when stored separated at room temperature and at 2 °C–8 °C, respectively. The stability of PTH in serum was decreased to 4 h when stored unseparated, to 8 h when stored separated at room temperature, and to 48 h when stored separated at 2 °C–8 °C.

Baseline analyte concentrations were highly correlated, with similar values measured in lithium heparin (n = 18), EDTA (n = 18), and serum (n = 18). Although a

difference between EDTA and serum was observed for  $\beta$ -CTX and P1NP (3.4% and 3.7% lower, respectively, in EDTA), this difference was deemed statistically insignificant and consistent with inter-assay imprecision.

For the measurement of  $\beta$ -CTX and OC, we recommend that samples be collected into EDTA-containing tubes and undergo separation procedures as soon as possible. If samples are not analyzed immediately, we recommend they be stored frozen. This information is vital to ensure the validity of results for any laboratories referring or accepting samples. Serum bone ALP and plasma or serum P1NP are stable and suitable for routine processing. For PTH, collection into EDTA- or lithium heparin-containing tubes is recommended. We recommend that serum samples be processed immediately or be separated and stored frozen until analysis. These results have important implications for laboratories that accept PTH samples from primary care clinics or that use PTH as an “add-on” test for investigation of an abnormal calcium result.

Our data have produced stability guidelines that will allow laboratories to follow optimal sample-collection and -storage procedures for each analyte investigated, thereby improving their analysis and consequently their clinical utility.

**Author Contributions:** *All authors confirmed they have contributed to the intellectual content of this paper and have met the following 3 requirements: (a) significant contributions to the conception and design, acquisition of data, or analysis and interpretation of data; (b) drafting or revising the article for intellectual content; and (c) final approval of the published article.*

**Authors' Disclosures or Potential Conflicts of Interest:** *No authors declared any potential conflicts of interest.*

**Role of Sponsor:** The funding organizations played a direct role in the design of the study, the choice of enrolled patients, the review and interpretation of data, and the preparation and final approval of the manuscript.

## References

1. Fraser WD. The burden of osteoporosis and the case for disease management. *Dis Manag Clin Outcomes* 2004;12:409–18.
2. Seibel MJ. Biochemical markers of bone remodeling. *Endocrinol Metab Clin North Am* 2003;32:83–113.
3. Christgau S, Bitsch-Jensen O, Hanover Bjarnason N, Gamwell Henriksen E, Qvist P, Alexandersen P, Bang Henriksen D. Serum CrossLaps for monitoring the response in individuals undergoing antiresorptive therapy. *Bone* 2000;26:505–11.
4. WHO. Use of anticoagulants in diagnostic laboratory investigations and stability of blood, plasma and serum samples. Geneva: WHO; 2002. [http://whqlibdoc.who.int/hq/2002/WHO\\_DIL\\_LAB\\_99.1\\_Rev.2.pdf](http://whqlibdoc.who.int/hq/2002/WHO_DIL_LAB_99.1_Rev.2.pdf) (Accessed October 2010).
5. Rodríguez-Mendizábal M, Lucena MI, Cabello MR, Blanco E, López-Rodríguez B, Sánchez de la Cuesta F. Variations in blood levels of aminoglycosides related to in vitro anticoagulant usage. *Ther Drug Monit* 1998;20:88–91.

Felicity J. Stokes<sup>2</sup>  
Petko Ivanov<sup>2</sup>  
Lisa M. Bailey<sup>2</sup>  
William D. Fraser<sup>3\*</sup>

<sup>2</sup> Department of Clinical Chemistry and Metabolic Medicine  
Royal Liverpool University Hospital  
Liverpool, UK

<sup>3</sup> Department of Musculoskeletal Biology  
Institute of Aging and Chronic Disease  
University of Liverpool  
Liverpool, UK

\*Address correspondence to this author at:  
Department of Musculoskeletal Biology  
Institute of Aging and Chronic Disease  
University of Liverpool  
Liverpool L69 3GA, UK  
Fax 0151-706-5813  
E-mail w.d.fraser@liverpool.ac.uk

Previously published online at  
DOI: 10.1373/clinchem.2010.157289
